# Supplementary material for: Target-selective cytosolic delivery of cargo proteins using the VHH-presented OLE-ZIP capsules
Source: Royal Society of Chemistry journal article supplement (doi:10.1039/d4pm00069b), 2024-01-01
Supplement: d4pm00069b1.pdf [file d4pm00069b1.pdf]

## Supporting Information

### Target-selective cytosolic delivery of cargo proteins using the VHH-presented OLE-ZIP capsules

Kousuke Takahashi,<sup>a</sup> Yasumichi Inoue,<sup>b</sup> Shigeaki Hida,<sup>b</sup> Ryuki Hosoda,<sup>a</sup> Naoki Umezawa,<sup>b</sup> Isamu Akiba,<sup>c</sup> Mitsuo Umetsu<sup>d</sup> and Toshihisa Mizuno<sup>a,c\*</sup>

<sup>a</sup>*Department of Life Science and Applied Chemistry, Graduate School of Engineering, Nagoya Institute of Technology, Gokiso-cho, Showa-ku, Nagoya, Aichi 466-8555, Japan.*

<sup>b</sup>*Graduate School of Pharmaceutical Sciences, Nagoya City University, 3-1 Tanabe-dori, Mizuho-ku, Nagoya 467-8603, Japan.*

<sup>c</sup>*Faculty of Environmental Engineering, the University of Kitakyushu, 1-1 Hibikino, Wakamatsu, Kitakyushu, Fukuoka 808-0135, Japan*

<sup>d</sup>*Department of Biomolecular Engineering, Graduate School of Engineering, Tohoku University, Sendai, Miyagi 980-8579 Japan*

<sup>e</sup>*Department of Nanopharmaceutical Sciences, Nagoya Institute of Technology, Gokiso-cho Showa-ku, Nagoya, Aichi 466-8555, Japan*

\*Corresponding author: [toshitem@nitech.ac.jp](mailto:toshitem@nitech.ac.jp)

(a) Trx-OLE-ZIP

MSDKI IHLTD DSFDT DVLKA DGAIL VDFWA EWCGP CKMIA PILDE IADEY  
QGKLT VAKLN IDQNP GTAPK YGIRG IPTLL LFKNG EVAAT KVGAL SKGQL  
KEFLD ANLAG SGSGH MHHHH HHSSG LVPRG SAMAA LKKEL QANKK ELAQL  
KWELQ ALKKE LAQGG SGGSF GLTGI TLVGT VIGLA LATPL FVIFS PVIVP  
AMIAI GLAVT GFLTI GTFGL GGSGG SEQLE KKLQA LEKKL AQLEW KNQAL  
EKKLA QKLAA ALEHH HHHH

(b) VHH-OLE-ZIP-EV0

DYKDD DDKGG TQVQL QESGG GLVQA GGSLL LSCAA SGRTF SSYAM GWFRQ  
APGKE REFVA AINWS GGSTS YADSV KGRFT ISRDN TKNTV YLQMN SLKPE  
DTAAF YCAAT YNPYS RDHYF PRMTT EYDYW GQGTQ VTVSS VDGGS GGSGG  
SGGSA LKKEL QANKK ELAQL KWELQ ALKKE LAQGG SGGSF GLTGI TLVGT  
VIGLA LATPL FVIFS PVIVP AMIAI GLAVT GFLTI GTFGL GGSGG SEQLE  
KKLQA LEKKL AQLEW KNQAL EKKLA Q

(c) VHH-OLE-ZIP-EV1

DYKDD DDKGG TQVQL QESGG GLVQA GGSLL LSCAA SGRTF SSYAM GWFRQ  
APGKE REFVA AINWS GGSTS YADSV KGRFT ISRDN TKNTV YLQMN SLKPE  
DTAAF YCAAT YNPYS RDHYF PRMTT EYDYW GQGTQ VTVSS AGGVE SAGGS  
AGGSA GGSAG GSAGG SGSAG GSAGG STSAG GSAGG SAGGS AGGSA GGSAGS  
AGGSA GGSTS AGGSA GGSAG GSAGG SAGGS GSAGG SAGGS TSAGG SAGGS  
AGGSA GGSAG GVDGG SGGSG GSGGS ALKKE LQANK KELAQ LKWEL QALKK  
ELAQG GSGGS FGLTG ITLVG TVIGL ALATP LRVIF SPVIV PAMIA IGLAV  
TGFLT IGTFG LGGSG GSEQL EKKLQ ALEKK LAQLE WKNQA LEKKL AQ

(d) VHH-OLE-ZIP-EV2

DYKDD DDKGG TQVQL QESGG GLVQA GGSLL LSCAA SGRTF SSYAM GWFRQ  
APGKE REFVA AINWS GGSTS YADSV KGRFT ISRDN TKNTV YLQMN SLKPE  
DTAAF YCAAT YNPYS RDHYF PRMTT EYDYW GQGTQ VTVSS AGGVE SAGGS  
AGGSA GGSAG GSAGG SGSAG GSAGG STSAG GSAGG SAGGS AGGSA GGSAGS  
AGGSA GGSTS AGGSA GGSAG GSAGG SAGGS GSAGG SAGGS TSAGG SAGGS  
AGGSA GGSAG GVESA GGSAG GSAGG SAGGS AGGSG SAGGS AGGST SAGGS  
AGGSA GGSAG GSAGG SGSAG GSAGG STSAG GSAGG SAGGS AGGSA GGSAGS  
AGGSA GGSTS AGGSA GGSAG GSAGG SAGGV DGGSG GSGGS GGSAL KKELQ  
ANKKE LAQLK WELQA LKKEL AQGGS GGSFG LTGIT LVGTV IGLAL ATPLF  
VIFSP VIVPA MIAIG LAVTG FLTIG TFGLG GSGGS EQLEK KLQAL EKKLA  
QLEWK NQALE KKLAQ

Figure S1. Amino acid sequences of the Trx-OLE-ZIP and VHH-OLE-ZIP-EV<sub>n</sub> ( $n = 0, 1,$  and  $2$ ).

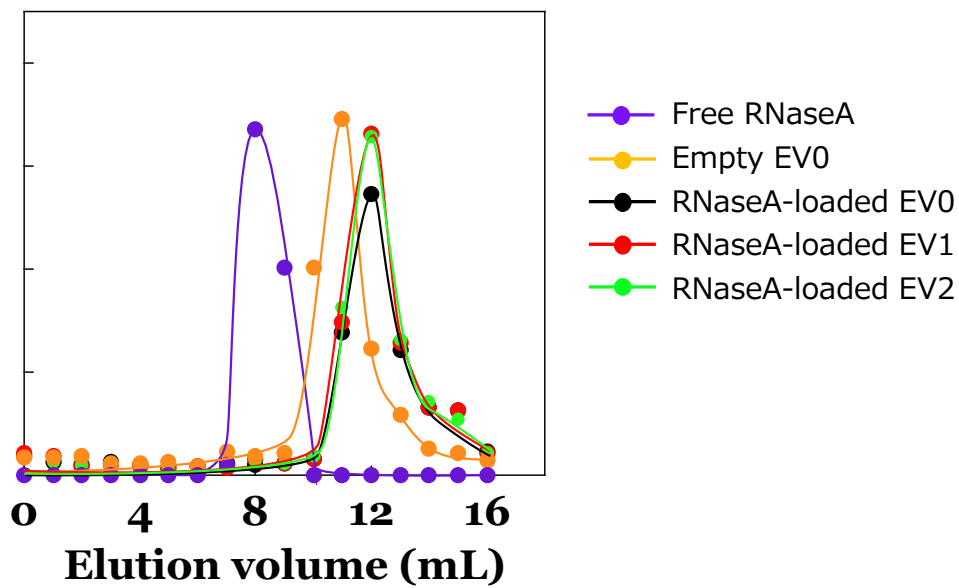

**Figure S2.** Summary of the GPC chromatograms for RNaseA-loaded EV0, EV1, and EV2, along with empty EV0 and free RNaseA as reference. TOYOPEARL HW-50F served as the gel filtration carrier and was packed into a chromatography column (6 mm in diameter, 800 mm in height), which was then equilibrated. Subsequently, RNaseA-loaded EV0, EV1, and EV2, as well as empty EV0 and free RNaseA, were separately analysed using this column for GPC. FITC-labelled RNaseA was utilized for this experiment.

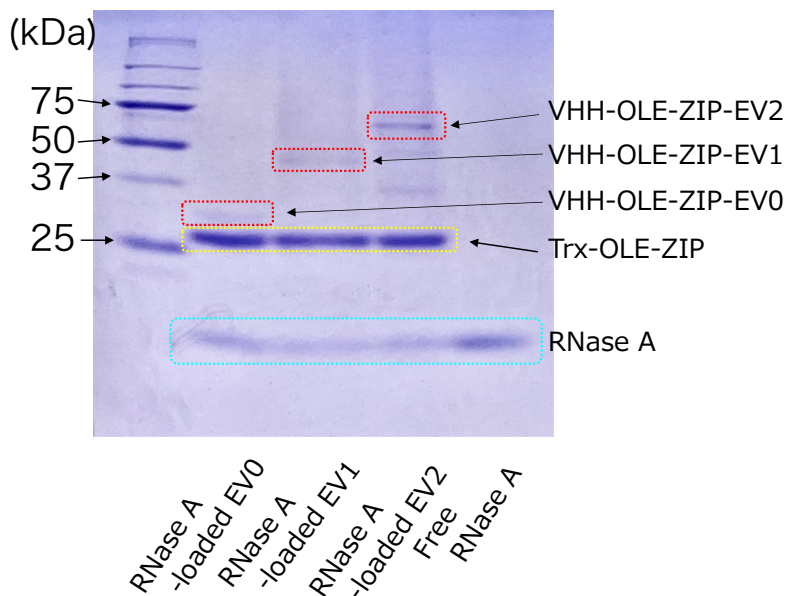

**Figure S3.** 15% SDS-PAGE analyses of the isolated RNaseA-loaded EV0, EV1, EV2 and free RNaseA.

(a) RNaseA-loaded EV0

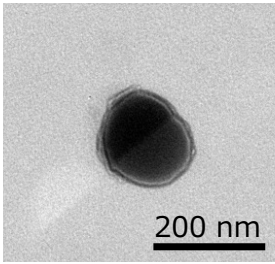

(b) RNaseA-loaded EV1

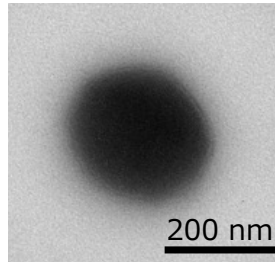

(c) RNaseA-loaded EV2

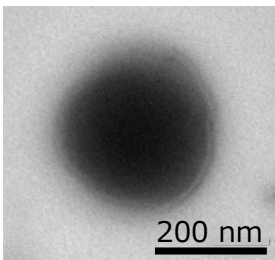

**Figure S4.** TEM images of the RNaseA-loaded EV0, EV1, and EV2.
